# Supplementary material for: Explicit and implicit affective attitudes of female athletes towards different body sizes
Source: Springer Nature journal article supplement (doi:10.1186/s40359-025-02567-6), 2025-03-14

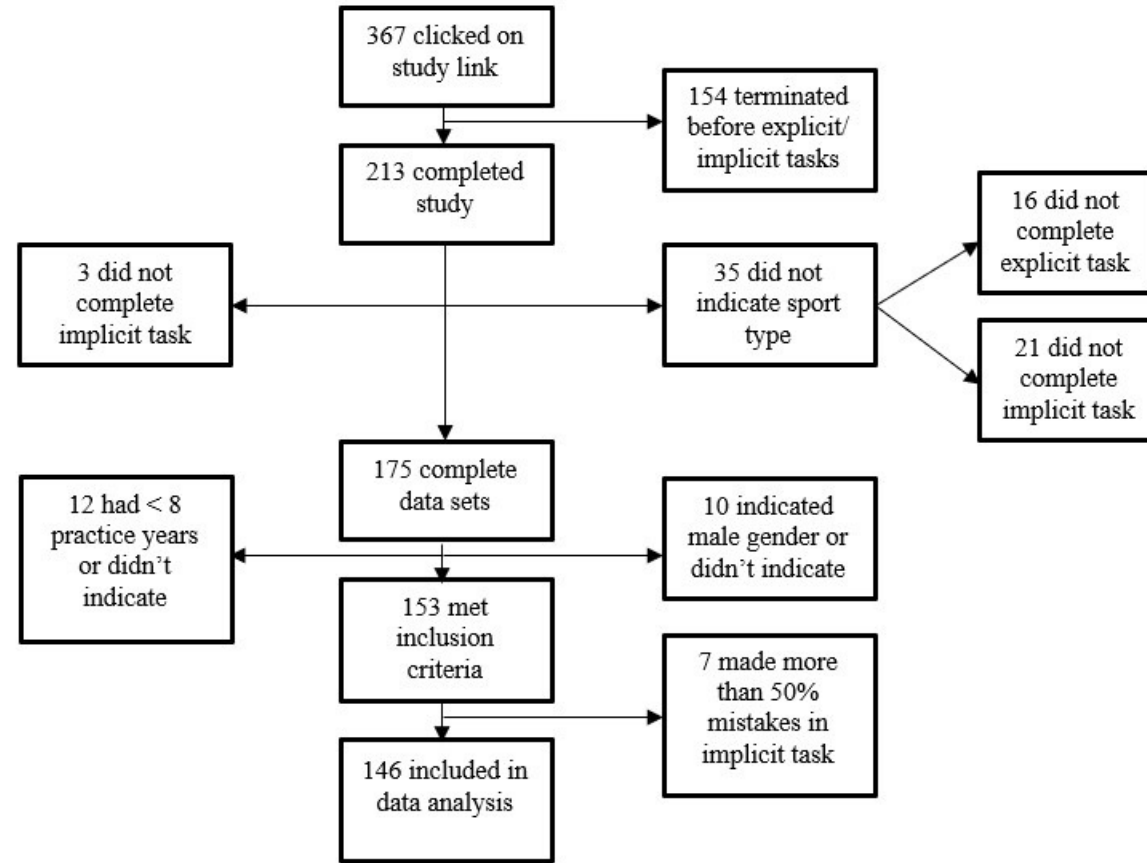

Supplement: MOESM1 [file 40359_2025_2567_MOESM1_ESM.pdf]
